# Supplementary material for: Impaired PRC2 activity promotes transcriptional instability and favors breast tumorigenesis
Source: PubMed Central journal article supplement (PMC4699384; doi:10.1101/gad.269522.115), 2015-12-15
Supplement: supp_gad.269522.115_SuppMaterial.pdf [file supp_gad.269522.115_SuppMaterial.pdf]

## Supplemental Figure Legends

### Supplementary Figure 1 (Related to Figure 1)

(A) anti-Ezh2, -Ezh1 and -Suz12 IHC of normal mouse prostate and Hi-Myc invasive prostate cancer. (B) Western blot showing loss of Ezh2 protein in *Hi-Myc; Ezh2*  $\Delta/\Delta$  prostate adenocarcinoma. (C) HE staining and IHC of different proteins as indicated on top in WT (normal prostate), Hi-Myc and Hi-Myc Ezh2-KO invasive adenocarcinoma. (C) IHC of histone H3, Ezh1 and smooth muscle actin (SMA) in WT (normal prostate), Hi-Myc and Hi-Myc Ezh2-mutant invasive adenocarcinomas. (D) Left panel: western blot of Ezh2 and Lamin B1 (loading control) on whole lysates from wild type prostate, *Pten*-mutant and double *Pten/Ezh2*-KO prostate cancers. Right panel: HE staining of a normal prostate, *Pten*-mutant and double *Pten/Ezh2*-KO prostate adenocarcinomas.

### Supplementary Figure 2 (Related to Figure 2)

(A) Box plots of *EZH2* and *Ki67* mRNA abundance in primary versus metastatic prostate cancer (data from Taylor et al., 2010). p-value (Mann-Whitney) and mean log<sub>2</sub>-expression difference between metastatic and primary cancer are shown on each graph (B) Left panel: heat-map of hierarchical clustering of the most-significantly varying transcripts in breast cancers (BCa) of the Curie cohort. Samples are arranged horizontally and transcripts vertically. The cluster containing *EZH2* transcript is shown in greater detail on the right. Right panel: gene ontology (DAVID: <http://david.abcc.ncifcrf.gov/>) of the *EZH2* cluster showing the 20 most significantly enriched categories, their fold enrichment and corresponding p-value. (C) Top panel: graphical representation of copy-number variations along human chromosome 7 in a Curie cohort of breast cancers. The different samples are displayed horizontally and color-coded according to their ploidy and molecular subtypes (Basal, HER2-positive, Luminal A and Luminal B) as shown above. Copy-number events (losses, gains and amplifications) are displayed vertically following the color code as shown on the right. The positions of the centromere (black line) and of *EZH2* locus (red line) are highlighted. Bottom table represents numbers and corresponding percentages of losses, gains and amplifications of the *EZH2* locus in the different molecular subtypes. (D) Dot plots of Ezh2 signal intensity (arbitrary units) from the western blots shown in Figure 2B, as a function of the growth rate in sh-scr. (blue) and sh-Ezh2 (red) cells. (E) Correlation plot of H3K27me3 vs. EZH2 staining intensities across the same two patient-derived xenografts (PDX) shown in Figure 4. Intensity values were normalized to the control (untreated) condition. The corresponding coefficient of determination ( $R^2$ ) and p-value are shown.

### Supplementary Figure 3 (Related to Figure 3)

(A) ROC analysis of the prognostic association to death from breast cancer of *EZH2*, *ORC6* and the proliferation metagene. The dotted line represents the diagonal. The corresponding area under the curve (AUC) and p-values are displayed. Data is from the METABRIC dataset. (B, C) Comparison of ROC-curves of *EZH2* (B) and *ORC6* (C) before (green) and after (purple) adjustment to the proliferation metagene. Negative association to outcome is displayed below the diagonal for better clarity. The corresponding AUCs and p-values are displayed. (D) Kaplan-Meier plot of overall survival for patients of the TCGA cohort having primary tumors with normal, hemizygous loss or gain of *EZH2*. Hazard ratio (HR) and p-value between highest and lowest survival group are displayed.

#### **Supplementary Figure 4 (Related to Figure 4)**

(A) Western blot showing near-complete loss of H3K27me3 mark in the parental MDA-MB-231 clone at various times of 1  $\mu$ M UNC1999 treatment. (B) Proliferation curve of control (DMSO-treated) and UNC1999-treated cells after 8 days of UNC1999 treatment. (C) 3D invasion assay of control (DMSO-treated) or UNC1999-treated cells (see Figure 4 for experimental details). Images show representative phalloidin-labeled spheroids collected at T0 (inset) or T2 (scale bars: 200  $\mu$ m). Data represent mean invasion area in type I collagen at T2 normalized to the mean invasion area at T0  $\pm$  SEM ( $n=2$ ; 23 and 21 spheroids were analyzed for control and UNC1999-treated cells respectively). Red bars indicate mean  $\pm$  SD. The p-value of the two-tailed unpaired t test is indicated.

#### **Supplementary Figure 5 (Related to Figure 5)**

(A) Heat map showing changes in the transcriptome following OHT addition in iMEFs at different time-points after treatment. Values for each gene are median-centered. (B) Correlation plot of normalized read counts for H3K27me3 between Ezh1-rescue vs. Ezh2-rescue conditions at common target peaks. The corresponding coefficient of determination ( $R^2$ ) and p-value are shown.

## **Supplemental Table Legends**

### **Supplementary Table 1 (related to Figure 2)**

Normalized staining intensities of Ki67, H3K27me3 and EZH2 are shown for each treatment condition of the two analyzed tumorgrafts (HBCx34 TamR and HBCx22 TamR). Each value represents the mean from 3 independent experiments. 2 sections of each sample were analyzed giving a total of 6 measurements for each condition.

### **Supplementary Table 2 (related to Figure 3)**

Summary of the mutations and copy number alterations in genes encoding core PRC2 components in 58 breast cancer metastases.

### **Supplementary Table 3**

Primer sequences.

### **Supplementary Table 4**

Primer sequences used for qPCR analysis on single cells.

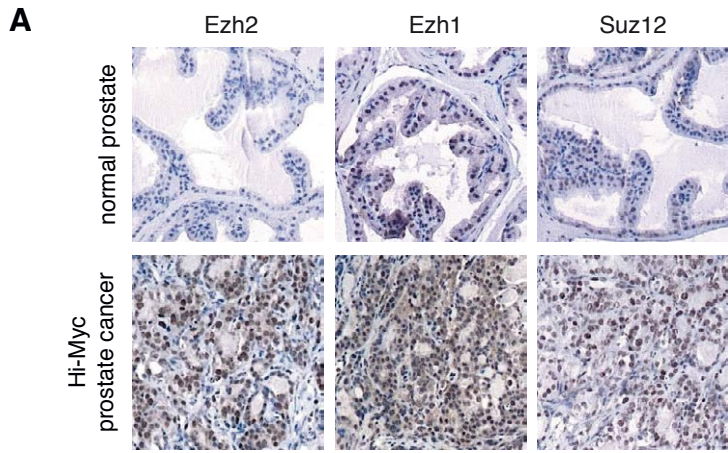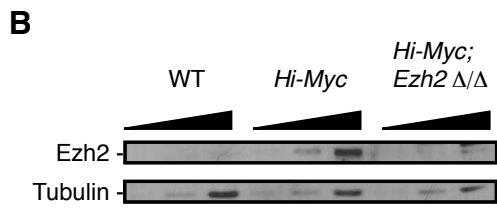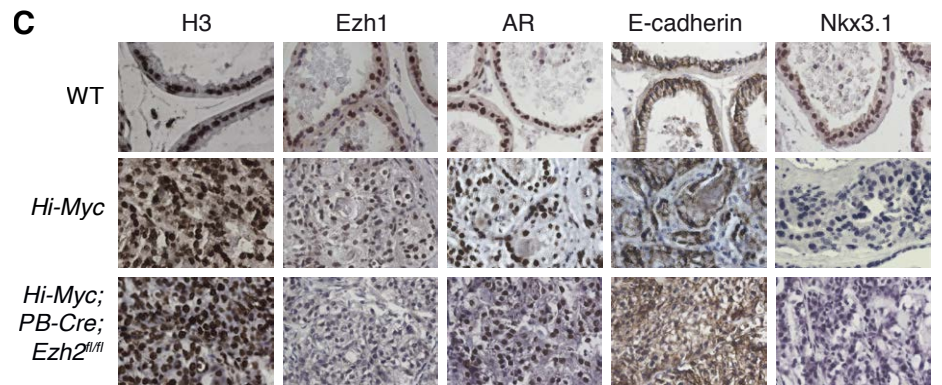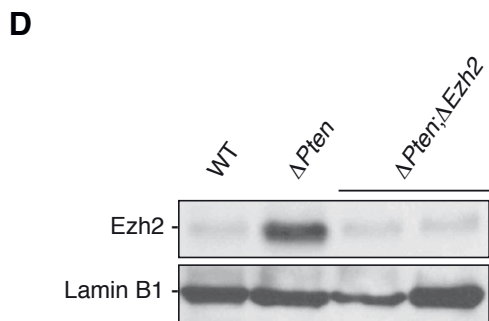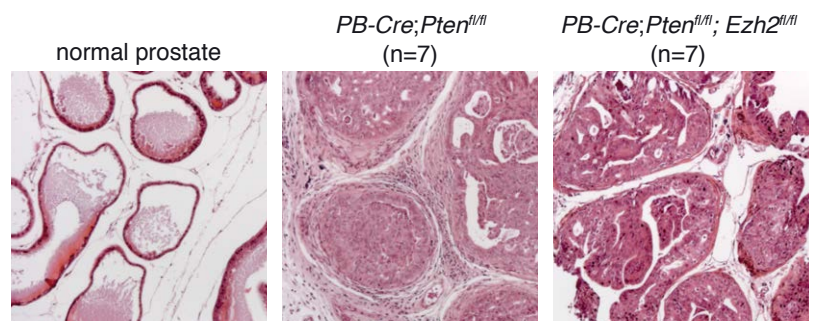

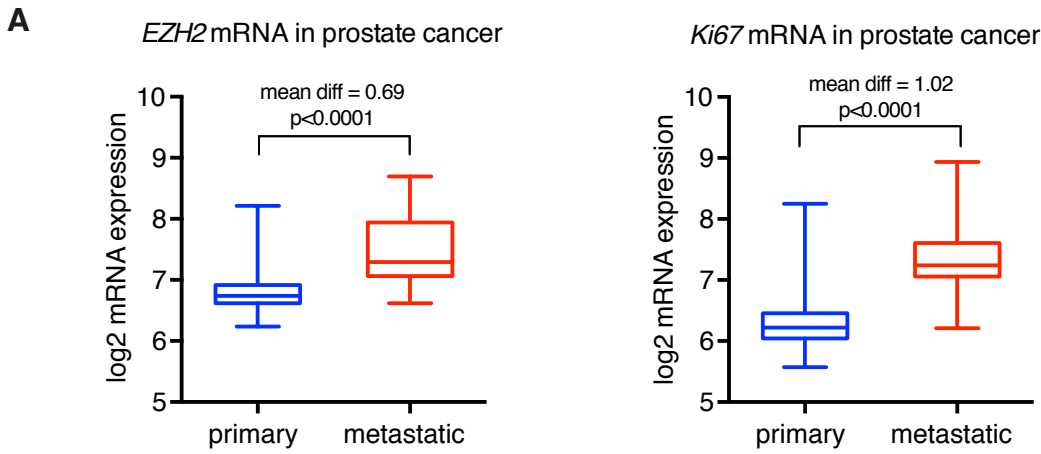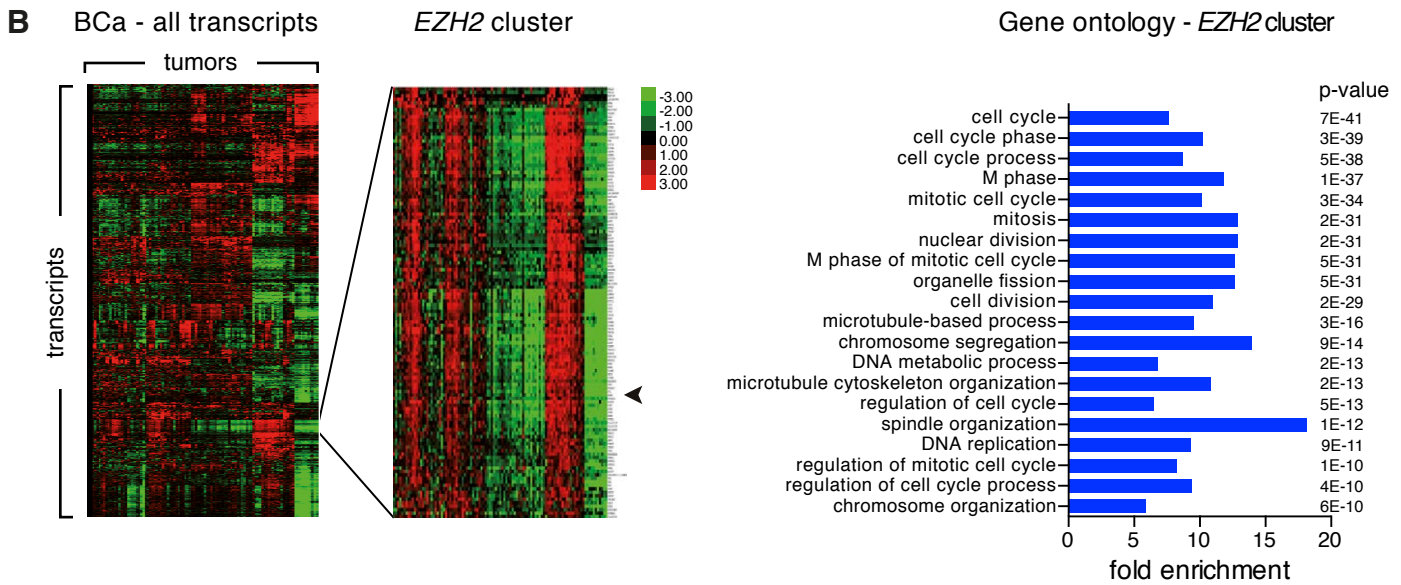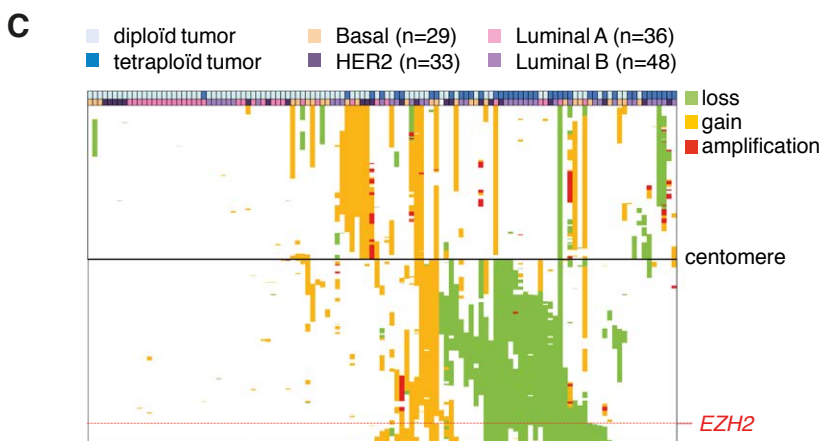

| Subtype   | nb of cases | status of EZH2 locus |     |      |     |               |    |
|-----------|-------------|----------------------|-----|------|-----|---------------|----|
|           |             | loss                 | %   | gain | %   | amplification | %  |
| Basal     | 29          | 4                    | 14% | 2    | 7%  | 0             | 0% |
| Her2      | 33          | 3                    | 9%  | 4    | 12% | 0             | 0% |
| Luminal A | 36          | 5                    | 14% | 0    | 0%  | 0             | 0% |
| Luminal B | 48          | 9                    | 19% | 3    | 6%  | 0             | 0% |
| TOTAL:    | 146         | 21                   | 14% | 9    | 6%  | 0             | 0% |

diploid tumor: loss:  $\leq 1$  ; gain:  $\geq 3$  ; amplicon:  $\geq 6$   
tetraploid tumor: loss:  $\leq 2$  ; gain:  $\geq 6$  ; amplicon:  $\geq 8$

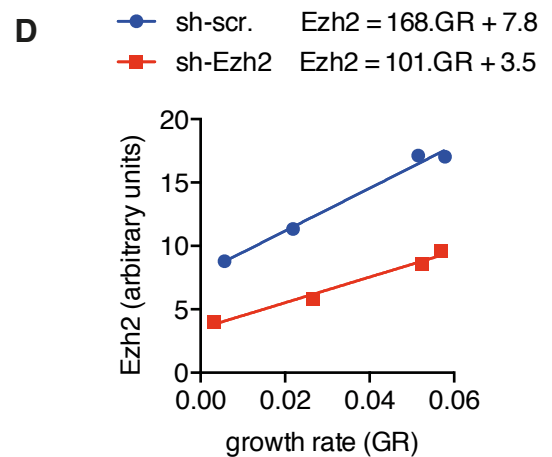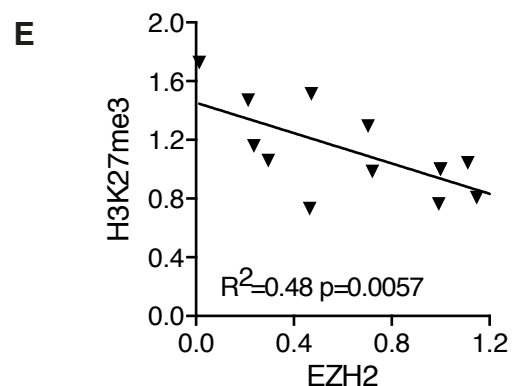

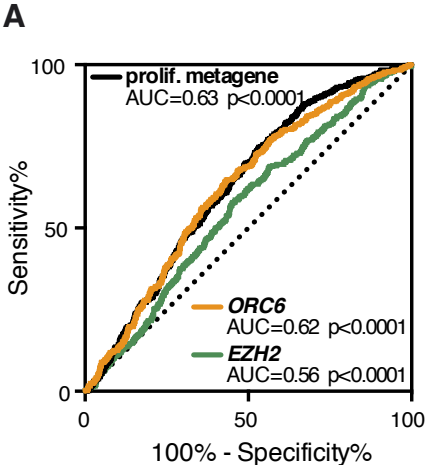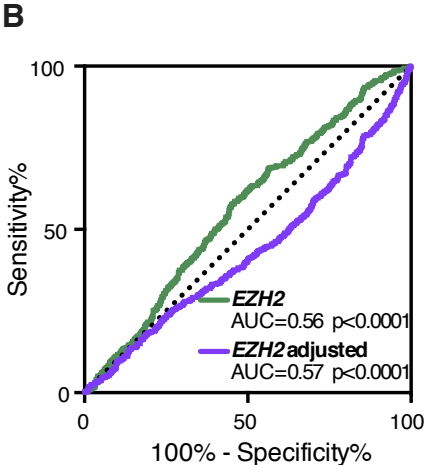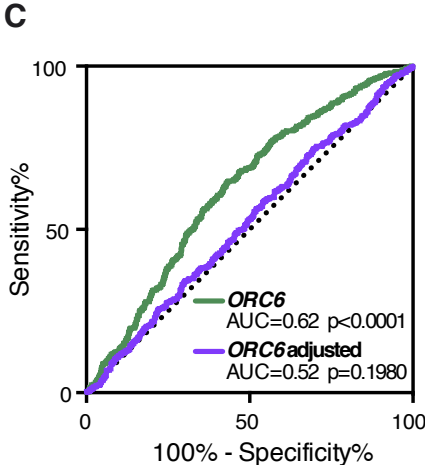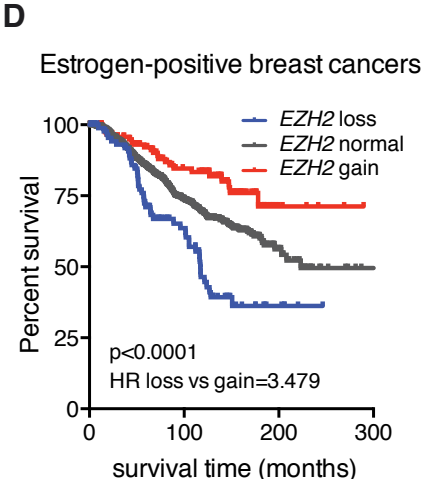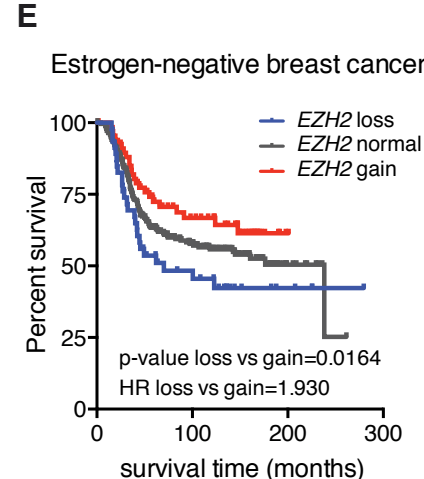

**A** EZH1/2 inhibition in MDA-MB-231

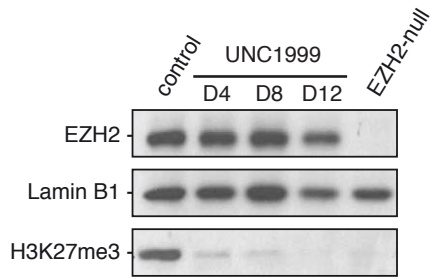

**B**

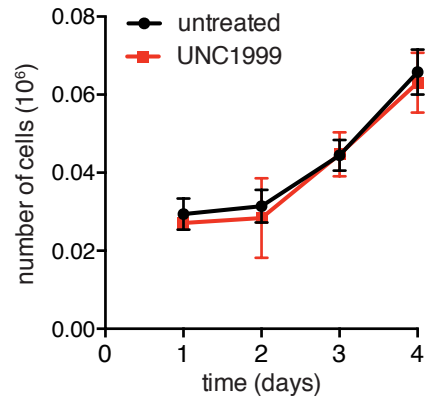

**C**

MDA-MB-231 invasion assay

control (n=23)      UNC1999 (n=21)

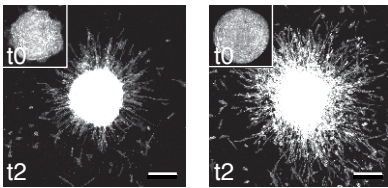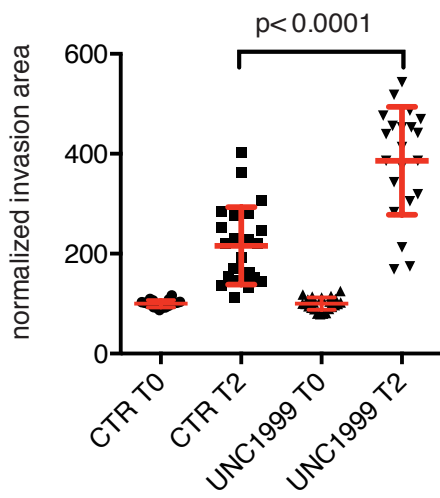

**A**

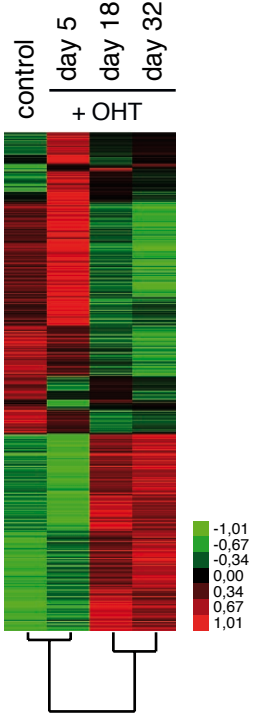

**B**

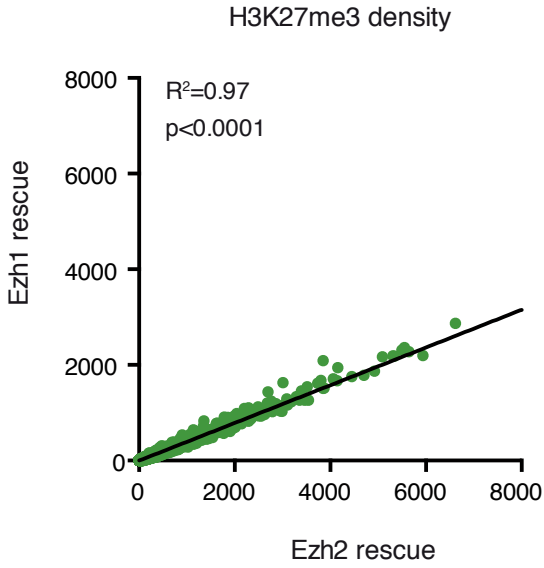



**Table S1**

| <b>treatment/tumorgraft</b> | <b>normalized signal values</b> |          |      |
|-----------------------------|---------------------------------|----------|------|
| HBCx34 TamR                 | Ki67                            | H3K27me3 | EZH2 |
| Control                     | 1.00                            | 1.00     | 1.00 |
| Everolimus                  | 0.59                            | 0.98     | 0.72 |
| Femara                      | 1.03                            | 0.76     | 0.99 |
| Tamoxifene                  | 0.43                            | 0.73     | 0.47 |
| Evero+Tam                   | 0.29                            | 1.06     | 0.30 |
| Fulvestran                  | 0.20                            | 1.16     | 0.24 |
| Evero+Fulv                  | 0.07                            | 1.73     | 0.01 |
|                             |                                 |          |      |
| HBCx22 TamR                 | Ki67                            | H3K27me3 | EZH2 |
| Control                     | 1.00                            | 1.00     | 1.00 |
| Everolimus                  | 0.59                            | 1.29     | 0.70 |
| Femara                      | 1.06                            | 0.81     | 1.15 |
| Tamoxifene                  | 0.83                            | 1.04     | 1.11 |
| Evero+Tam                   | 0.46                            | 1.51     | 0.47 |
| Fulvestran                  | 0.80                            | 0.78     | 1.31 |
| Evero+Fulv                  | 0.21                            | 1.47     | 0.21 |

**Table S2**

| Patient ID | Targeted NGS: EED, SUZ12, EZH2                                 | EZH2 CNV  | SUZ12 CNV | EED CNV |
|------------|----------------------------------------------------------------|-----------|-----------|---------|
| BCa-met-1  |                                                                | N         | GAIN      | HETLOSS |
| BCa-met-2  |                                                                | N         | GAIN      | HETLOSS |
| BCa-met-3  |                                                                | N         | GAIN      | N       |
| BCa-met-4  |                                                                | GAIN      | GAIN/a    | HETLOSS |
| BCa-met-5  |                                                                | GAIN      | HETLOSS   | GAIN    |
| BCa-met-6  |                                                                | N/HETLOSS | HETLOSS   | GAIN    |
| BCa-met-7  |                                                                | N         | HETLOSS   | GAIN/A  |
| BCa-met-8  |                                                                | N         | HETLOSS   | HETLOSS |
| BCa-met-9  |                                                                | N         | HETLOSS   | HETLOSS |
| BCa-met-10 |                                                                | N         | HETLOSS   | HETLOSS |
| BCa-met-11 |                                                                | N         | HETLOSS   | HETLOSS |
| BCa-met-12 |                                                                | N         | HETLOSS   | HETLOSS |
| BCa-met-13 |                                                                | N/HETLOSS | HETLOSS   | HETLOSS |
| BCa-met-14 |                                                                | N         | HETLOSS   | HETLOSS |
| BCa-met-15 |                                                                | GAIN      | HETLOSS   | HETLOSS |
| BCa-met-16 |                                                                | HETLOSS   | HETLOSS   | HETLOSS |
| BCa-met-17 |                                                                | HETLOSS   | HETLOSS   | N       |
| BCa-met-18 | EZH2 Ex18 c.2075C>T 35% (240/131) Ala692Val                    | N         | HETLOSS   | N       |
| BCa-met-19 |                                                                | N         | HETLOSS   | N       |
| BCa-met-20 |                                                                | N         | HETLOSS   | N       |
| BCa-met-21 |                                                                | N         | HETLOSS   | N       |
| BCa-met-22 | SUZ12 Ex1 c.98C>T 53% Ala33Val                                 | N/HETLOSS | HETLOSS   | N       |
| BCa-met-23 |                                                                | N         | HETLOSS   | N       |
| BCa-met-24 |                                                                | GAIN      | HETLOSS   | HETLOSS |
| BCa-met-25 |                                                                | GAIN      | HETLOSS   | N       |
| BCa-met-26 |                                                                | N         | HETLOSS   | N       |
| BCa-met-27 | SUZ12 Exon1 14% (7/47) c.61G>C p.Gly21Arg                      | HETLOSS   | N         | GAIN    |
| BCa-met-28 |                                                                | N         | N         | GAIN    |
| BCa-met-29 |                                                                | N/HETLOSS | N         | GAIN    |
| BCa-met-30 | EZH2 -1 of exon 11 (splicing) 27% (428/161) chr7:148514484 G>C | HETLOSS   | N         | HETLOSS |
| BCa-met-31 |                                                                | N         | N         | HETLOSS |
| BCa-met-32 |                                                                | HETLOSS   | N         | HETLOSS |
| BCa-met-33 |                                                                | N         | N         | HETLOSS |
| BCa-met-34 |                                                                | N         | N         | HETLOSS |
| BCa-met-35 |                                                                | N         | N         | HETLOSS |
| BCa-met-36 |                                                                | N/HETLOSS | N         | HETLOSS |
| BCa-met-37 |                                                                | HETLOSS   | N         | N       |
| BCa-met-38 |                                                                | HETLOSS   | N         | N       |
| BCa-met-39 |                                                                | N         | N         | N       |
| BCa-met-40 |                                                                | GAIN      | N         | N       |
| BCa-met-41 |                                                                | N         | N         | N       |
| BCa-met-42 |                                                                | GAIN      | N         | N       |
| BCa-met-43 |                                                                | GAIN      | N         | N       |
| BCa-met-44 |                                                                | HETLOSS   | N         | N       |
| BCa-met-45 |                                                                | N         | N         | N       |
| BCa-met-46 |                                                                | N         | N         | N       |
| BCa-met-47 |                                                                | N         | N         | N       |
| BCa-met-48 |                                                                | N         | N         | N       |
| BCa-met-49 |                                                                | N         | N         | N       |
| BCa-met-50 |                                                                | N         | N         | N       |
| BCa-met-51 |                                                                | N         | N         | N       |
| BCa-met-52 |                                                                | N         | N         | N       |
| BCa-met-53 |                                                                | N         | N         | N       |
| BCa-met-54 |                                                                | N         | N         | N       |
| BCa-met-55 |                                                                | N         | N         | N       |
| BCa-met-56 |                                                                | N         | N         | N       |
| BCa-met-57 |                                                                | N         | N         | N       |
| BCa-met-58 |                                                                | N         | N         | N       |

**Table S3**

| <b>Name</b>  | <b>Application</b> | <b>Sequence</b>              | <b>Reference</b>       |
|--------------|--------------------|------------------------------|------------------------|
| p16_fw       | RT-qPCR            | GTGTGCATGACGTGCGGG           | Bruggeman et al., 2005 |
| p16_rev      | RT-qPCR            | GCAGTTCGAATCTGCACCGTAG       | Bruggeman et al., 2005 |
| p19_fw       | RT-qPCR            | GCCGCACCGGAATCCT             | Bruggeman et al., 2005 |
| p19_rev      | RT-qPCR            | TTGAGCAGAAGAGCTGCTACGT       | Bruggeman et al., 2005 |
| p21_fw       | RT-qPCR            | TTGCACTCTGGTGTCTGAGC         | He et al., 2011        |
| p21_rev      | RT-qPCR            | TGCGCTTGGAGTGATAGAAA         | He et al., 2011        |
| TBP_fw       | RT-qPCR            | ATCCCAAGCGATTTGCTG           | this study             |
| TBP_rev      | RT-qPCR            | CCTGTGCACACCATTTTTCC         | this study             |
| Ezh2_fw      | RT-qPCR            | AATACATGTGCAGCTTTCTGTTC      | this study             |
| Ezh2_rev     | RT-qPCR            | ACGAATTTTGTGGCCCTTTC         | this study             |
| foxf1a_fw    | ChIP               | CCCgcgggcttctctactcttatt     | this study             |
| foxf1a_rev   | ChIP               | GGCAGGAAGTTTACAAGGCTCAACG    | this study             |
| p16-prom_fw  | ChIP               | GATGGAGCCCGGACTACAGAAG       | Bracken et al., 2007   |
| p16-prom_rev | ChIP               | CTGTTTCAACGCCAGCTCTC         | Bracken et al., 2007   |
| p19-prom_fw  | ChIP               | AAAACCCTCTCTTGGAGTGGG        | Bracken et al., 2007   |
| p19-prom_rev | ChIP               | GCAGGTTCTTGGTCACTGTGAG       | Bracken et al., 2007   |
| p21-prom_fw  | ChIP               | AGCAGCAAATCGGAGCTCAGCAG      | this study             |
| p21-prom_rev | ChIP               | TGAAGCAGCCCCACCTCTTCAA       | this study             |
| actin_fw     | ChIP               | CCCAACACACCTAGCAAATTAGAACCAC | this study             |
| actin_rev    | ChIP               | CCTGGATTGAATGGACAGAGAGTCACT  | this study             |

**Table S4**

| <b>Target</b> | <b>Forward primer</b>   | <b>Reverse primer</b>    |
|---------------|-------------------------|--------------------------|
| 1700019D03Rik | GCCAGGGGCATGAGAACA      | GCAAGCACTAGTCCCTTTCACTA  |
| 1700028P14Rik | AACTCTCCGCTCACATCACA    | TGGGGAAGGCTTCTCTGTTAC    |
| 2310005G13Rik | CAAGAGTCGGCCCATATCAC    | TCCACCAGAGACCTATGGTAAC   |
| 2310042E22Rik | TCAGTCTCCCATCTGGTTCC    | AAAGCCATGACAGGAAAGCA     |
| 4921506M07Rik | GGATAGTGCTCTTCCCACAAC   | TGCATGAATCCTCTTGTTCC     |
| 4930522H14Rik | GGCATCTGCTTTGTGGTTCC    | GGTTTGCATGATCCTTGCTTCA   |
| 5830473C10Rik | CATGTCAGTGGGCAGGATCA    | CCTGAAGAACTGAGCCACCATA   |
| 9130409I23Rik | AATGATCGACGTCGGGAGATA   | CAGGTTAGGGTCCGGTTTCA     |
| A1cf          | GGGGATTTGCCTTTGTGGAA    | AGGATGTCCCCACAACCTGAA    |
| Abcb4         | AAGGGCACCACTGAACTCAA    | GAACATTCCAACCTTGTACACAA  |
| Acot5         | GCGCCACGCTCTTTCTG       | CAGAAGGCCACCTCCAACCT     |
| Acrbp         | AGTTCTCCCACCTTCCATGAC   | CTCAGGCCAAGGCTGGAA       |
| Actb          | CCCTAAGGCCAACCGTGAAA    | AGCCTGGATGGCTACGTACA     |
| Agr3          | CACATGGGTGCAAACCTTACGAA | AGTCTCCAGGTGGTGAATAAC    |
| Art2a-ps      | CTACTCAAGCAGCCAACGTTA   | AAGACCGAGGAGAACCACAA     |
| Bmp10         | TCCATGCCGTCTGCTAACA     | CCGGAGCCCATTAAGGTGAC     |
| Bpi           | AGAGACTCTGTGCTCCTCCAAAC | AACCGAGGTCACATCATCCA     |
| Bub1          | AGCCATCAAGACCAAGACAGAA  | AGCAAAGGCTCCTTCTCCAA     |
| Calr3         | CAAGCCGAGTGACTGGAACA    | GTGATGCCCTCAGCTTTCA      |
| Ccdc146       | TTAGCTGAAACACCAGCTTTCC  | ACTCTGCCATTCTGGTTCCA     |
| Cckar         | CTGGATCAACCTCAGCCTTCA   | CCCAGCACACTGAGAAGGAA     |
| Ccnb1         | GCCTGAGCCTGAACCTGAA     | TCGGGCTTGGAGAGGGATTA     |
| Ccne1         | CTGTGAAAAGCGAGGATAGCA   | TGTTAGGGGTGGGGATGAAA     |
| Ccnf          | TGTGGCCTTCTCCACAGAA     | CCAACTTCACAGCAGCTTCA     |
| Cd200r4       | ATGACAGTTCATCTTCTCTGACA | AGGCAGGTGTCTGTGTTTTA     |
| Cd72          | GCGGCTTAGAGGAGTTGCTA    | ACAATGTCGGCTTTGAGAGTCA   |
| Cdh22         | CATCGTGGTTACTGACGTCAAC  | GGCTGACTCCTGTATGCTGAA    |
| Cdkn3         | CAGACGAAGAACCTGTTGATGAA | ATTCACTCGCGACAGAGGTA     |
| Cmtm2a        | TCCCTTCGTCTTCTGGCCTA    | ATATGCCACCTCCAAGGAACAC   |
| Cnga1         | TACAAAAGGCGAGGACCATCA   | CTTTGTTGCTGCTGTTGTTGAC   |
| Cpa6          | ATCGGTCTGCCTTTTGTCA     | CATGGCTGGGTGAGTCTTGTA    |
| Cpb2          | GGCACAGACCTGAACAGGAA    | TTCAGAGCAGGAGGAACCTGAC   |
| Ctxn2         | TGAAGATCCGAGGTTTTGGAA   | TGGTGGCTCTTACAGAGTTCC    |
| Defb26        | GGTTGCTAACTCAGGGGAAC    | TGACATCGGACTCTGCAGTA     |
| Dgat2l6       | GCCCTTGTCTGTGCTCTTCTTA  | TACCCAAGCTGAACGCCTAC     |
| Dntt          | CAGAGGGGATTCTTGCCTA     | GCTTCAGAACTTTCTCCATCTTCA |
| E2F1          | AGCTCATTGCCAAGAAGTCC    | TTCAAGCCGCTTACCAATCC     |
| Fam159b       | CAGCTACTCCCCTACAAGCA    | AGCGATTCCCAATCCAACCA     |
| Fam71f1       | CCGTGGTGTTCGAAAGCAA     | GCCATTGTGTTGGAAGCCTTA    |
| Fras1         | GAGCCACAGCTGATCAACATAC  | TGCTGACGTGGAGAACTTCA     |
| Gapdh         | AGACGGCCGCATCTTCTT      | TTCACACCGACCTTCACCAT     |
| Glyat         | CAAGGTGCACAGATGCTACA    | TCATGTGATAGACGGTCCCATA   |
| Gm10857       | CTCCCATGTGCTAGGTCTCA    | ATCTCTGAGAGCCGTCAACA     |

|          |                            |                         |
|----------|----------------------------|-------------------------|
| Gm14085  | GGAAGTGACACAGGGACTCA       | GCCTTCGTGAAAGGCTGAAA    |
| Gm4776   | TTCCTGTGCAAAGCTCAGAC       | CAGCACTCCAGCAATGCATA    |
| Gpr50    | AGACCTGATCGGGAECTCCA       | CAGAGAGGCTGGCCACAAA     |
| Hao2     | GCTGGATTTGGAGGCAAACA       | TAGACAGGGGAGTAGGAAGTCC  |
| Homer2   | AGCTCATGTCCGAGTGTGAA       | GACCGCACTTTGTCTTCCAA    |
| Hoxb9    | TGCGAAGGAAGCGAGGAC         | TCTAGCTCCAGCGTCTGGTA    |
| Hprt     | CAGTACAGCCCCAAAATGGTTA     | AGTCTGGCCTGTATCCAACA    |
| Hpse2    | TCAGCTGGAGGCACAAAACA       | CCCTGATTGGCCAACATTCTA   |
| Igf2bp3  | TTGAGCACTCGGTCCCTAAA       | ATTGTAAGTGGGGCGGGATA    |
| Il10     | AAAGGACCAGCTGGACAACA       | TAAGGCTTGGCAACCCAAGTA   |
| Il7      | TTGTTCTGCTGCCTGTAC         | TTCCGGCAATTACTATCAGTTCC |
| Irs4     | GGACTTTGCCAGACGAGACTA      | GTTTGGTTTTGGTGGCAGTGTA  |
| Lgi1     | CTGAAATCTCAGAAGGGAGTTTCTTA | CACATCAAAGGAGTTCGACGTA  |
| Mctp2    | CGAGGATCCCAGTGAAAGACA      | ATCCCCACATCCTTCACATCC   |
| Mdh1b    | GGCTTGCTTTTGGGAGGATAC      | ACTCCGTCGTATGTTGGAA     |
| Mep1a    | TCTTAAAGGCGACAGCCTCA       | TGGAACTTCAGTCCGGTTCA    |
| Ezh2     | GGGCAACAAAATTCGTTTTGCTA    | TCCTGTGGTCACCATTAACCA   |
| Nipal2   | CACATTGTGGTCTGCTCAC        | ATGCCTGAGACAGCCTTCA     |
| Npy1r    | TTCGGCCCACTCTGCTTTATA      | GTCCCGGATCTTGTCATCA     |
| Olf155   | TGTTCTGGCTGCTGTGGATA       | GGAGCTGTCTCCTGAACTGAA   |
| Onecut1  | ACCTTCGGGAGGATGTGGAA       | TCCCGTGTCTTGCTCTTTCC    |
| Pip5k1b  | ATCCACATGACAGGACTACCC      | GTCCCCTCTTCCAAGGTGAA    |
| Pou1f1   | GAAGGTGGGAGCAAACGAAA       | AGTGTCTCTCCAGAGCATCC    |
| Prkcq    | GGCGACTTAATGTACCACATCC     | AGGATGACCTCAGCAGCATAA   |
| Prss38   | GTGCTGCAGACATCAAGACA       | ACCAGGTCTGGTTCTGCTTA    |
| Psg16    | AAGCACACGTGCAAATCCAA       | TGAAGACCACTGAGCTCTGTAC  |
| Rad21    | GCACTCAGCAGATGCTTCA        | TCGACACAGCTCAAGCAAAC    |
| Rad51    | AACCCATTGGAGGGAACATCA      | GATTCTGGTCTCCCCTCTTCC   |
| Rad9b    | AAGTGATGCACGCACCTCTA       | CAAGAGCATGTCTTCAACTCAA  |
| Rdh12    | TTGAGACCCACTTTGGAGTCA      | GACTCCTCAGCCTCTCCAA     |
| Rdh18-ps | TTGGTGACTGACTGCATGGAA      | GAACTTGGCATCCCAGCCTA    |
| Rgag4    | AAATGCCCTTCGAGGAGAGAA      | TTGCCCGCAAGGAATTAAC     |
| Rgs22    | CCCCAGCTGGAGAGAAAATACA     | AATCCTCCCAAGGCTCCAAC    |
| Rnf128   | ATTTGGTGCGCATCCTAACC       | GGGGCAAGTCTGTGTTCTA     |
| Rorb     | GGAGCTGTGTCAGAACGATCA      | GAAGGCACGACACATTCTCAC   |
| Rrm2     | AGCAAAGCTGCGAGGAGAA        | CATCCTCAACGCTGGGGTTA    |
| Rxfp1    | TCAGTCGAATTTCCCCACTCA      | ACGGGTGAGGGCATTATTCA    |
| Scgn     | ATTCTGGCGCTCCAGGAAAA       | CTCAAAGTCCCTCTTCTTTCTCA |
| Slc26a3  | TGACATCGTCTCTGGCATCA       | GATGTTGACCAGCAGAGCAAA   |
| Slc2a10  | CTTCAACTGGGCAGCTAACC       | CCATAGAGCAGGAAGGTCCAA   |
| Slc7a12  | ACTTGGCAGTTTTGACATCCC      | TGTTTATCCATGTGACACCAAC  |
| Sult1c1  | CCTATGACCGACACCCTTTCA      | GGCATTGTTAGCCAGATCCA    |
| Svs6     | CAATGCTCCTTGTCTGGTGAC      | TCTTCAATTGCTTGCAGAAAC   |
| Taar4    | ACTTCAAGCAGCTCCACTCC       | ACCACGCAACTCAACAGGAA    |
| Tac2     | GACCAAAGGAGACATCACTTCCA    | TGTTCTCTTGCCATAAGTCC    |
| Tdh      | GGGTATCCAAGGTCCACACA       | CGCAGGCACCGAAAATCTAA    |

|        |                        |                       |
|--------|------------------------|-----------------------|
| Tdo2   | GGTGTA AACAGAGCCAGCAA  | TCTGAAGTTCTTGCGCATTCA |
| Top2a  | GCCAAGAGCTTTGGATCAAC   | GCTTTCCACAATACCACAACC |
| Tspan7 | GCCTCTTTGGATGCTTTGCTAC | GAACACCAGGGACAGGAACA  |
| Upk1b  | AAGAACAACGGGGTCACCAA   | CAGTCTGACGGACCGTTTACA |
| Wnt7b  | CGCCTCATGAACCTTCACAA   | CTGACACACCGTGACACTTAC |
| Wnt8a  | CCTGGTGAACCTTCACAACAA  | GCTTCCTGAGATGCCATGAC  |
